# Supplementary material for: Experimental evidence of physician social preferences
Source: PubMed Central journal article supplement (PMC9282368; doi:10.1073/pnas.2112726119), 2022-07-06
Supplement: pnas.2112726119.sapp.pdf [file pnas.2112726119.sapp.pdf]

Table A1. **Rationality (CCEI), altruism ( $\alpha$ ) and equality-efficiency orientation ( $\rho$ ) in the physician sample and the three other samples.**

|               | CCEI               |                    |                    | $\alpha$            |                    |                     | $\rho$          |                 |                     |
|---------------|--------------------|--------------------|--------------------|---------------------|--------------------|---------------------|-----------------|-----------------|---------------------|
|               | (1)                | (2)                | (3)                | (4)                 | (5)                | (6)                 | (7)             | (8)             | (9)                 |
|               | vs.                | vs.                | vs.                | vs.                 | vs.                | vs.                 | vs.             | vs.             | vs.                 |
|               | General            | ALP                | MS                 | General             | ALP                | MS                  | General         | ALP             | MS                  |
|               | ALP                | elites             |                    | ALP                 | elites             |                     | ALP             | elites          |                     |
| Physicians    | 0.14****<br>(0.01) | 0.10****<br>(0.02) | 0.04****<br>(0.01) | -0.07****<br>(0.02) | -0.09***<br>(0.03) | -0.11****<br>(0.02) | -0.01<br>(0.09) | -0.12<br>(0.26) | -0.53****<br>(0.10) |
| Female        | Yes                | Yes                | Yes                | Yes                 | Yes                | Yes                 | Yes             | Yes             | Yes                 |
| Age           | Yes                | Yes                | No                 | Yes                 | Yes                | No                  | Yes             | Yes             | No                  |
| Census region | Yes                | Yes                | Yes                | Yes                 | Yes                | Yes                 | Yes             | Yes             | Yes                 |
| Mean of       | 0.88               | 0.95               | 0.94               | 0.66                | 0.63               | 0.68                | -2.95           | -3.70           | -2.25               |
| N             | 1,277              | 366                | 787                | 1,277               | 366                | 787                 | 1,069           | 294             | 588                 |

Notes: Coefficients shown are from tobit regressions with CCEI (columns 1-3) and  $\alpha$  (columns 4-6) as the dependent variable, and median regressions with  $\rho$  (columns 7-9) as the dependent variable. The  $\rho$  parameter of purely selfless ( $\alpha = 0$ ) and purely selfish ( $\alpha = 1$ ) subjects, who always give nothing or everything to other, cannot be identified. In the regressions reported in columns 7-9, we thus omit purely selfless and purely selfish using a one-side  $t$ -test at the 10% level. Standard errors are in parenthesis. \*, \*\*, \*\*\*, and \*\*\*\* stand for 0.10, 0.05, 0.01, and 0.001 significance level, respectively.

Table A2. Differences in rationality (CCEI), altruism ( $\alpha$ ) and equality-efficiency orientation ( $\rho$ ) among physicians.

|                                                                             | CCEI            |                   | $\alpha$        |                    | $\rho$          |                 |
|-----------------------------------------------------------------------------|-----------------|-------------------|-----------------|--------------------|-----------------|-----------------|
|                                                                             | (1)             | (2)               | (3)             | (4)                | (5)             | (6)             |
| <i>Specialty (omitted: Primary Care)</i>                                    |                 |                   |                 |                    |                 |                 |
| Cardiology                                                                  | -0.15<br>(0.16) | -0.14<br>(0.19)   | -0.03<br>(0.15) | -0.16<br>(0.20)    | -0.04<br>(0.16) | -0.06<br>(0.21) |
| <i>Practice type (omitted: Hospital)</i>                                    |                 |                   |                 |                    |                 |                 |
| Private                                                                     | 0.06<br>(0.16)  | 0.10<br>(0.18)    | -0.17<br>(0.19) | -0.24<br>(0.20)    | 0.07<br>(0.20)  | -0.09<br>(0.23) |
| Cardiology $\times$ Private                                                 | 0.02<br>(0.32)  | -0.02<br>(0.35)   | 0.26<br>(0.30)  | 0.40<br>(0.34)     | -0.09<br>(0.28) | -0.01<br>(0.35) |
| Female                                                                      | -0.02<br>(0.12) | -0.02<br>(0.12)   | -0.18<br>(0.13) | -0.20<br>(0.13)    | -0.08<br>(0.14) | -0.11<br>(0.15) |
| <i>Age (omitted: <math>\leq 39</math>)</i>                                  |                 |                   |                 |                    |                 |                 |
| 40-49                                                                       | 0.24<br>(0.15)  | 0.25*<br>(0.15)   | -0.04<br>(0.15) | -0.05<br>(0.16)    | -0.17<br>(0.16) | -0.17<br>(0.17) |
| 50-59                                                                       | 0.03<br>(0.17)  | 0.05<br>(0.17)    | 0.02<br>(0.18)  | -0.01<br>(0.18)    | -0.25<br>(0.20) | -0.25<br>(0.20) |
| $\geq 60$                                                                   | -0.13<br>(0.20) | -0.17<br>(0.19)   | -0.17<br>(0.19) | -0.19<br>(0.18)    | -0.28<br>(0.21) | -0.27<br>(0.20) |
| <i>Practice size (number of physicians) (omitted: <math>\leq 35</math>)</i> |                 |                   |                 |                    |                 |                 |
| 36-100                                                                      |                 | -0.28<br>(0.18)   |                 | 0.13<br>(0.20)     |                 | -0.04<br>(0.22) |
| 101-350                                                                     |                 | -0.61**<br>(0.25) |                 | 0.30<br>(0.23)     |                 | 0.16<br>(0.26)  |
| 350-1600                                                                    |                 | -0.19<br>(0.23)   |                 | 0.18<br>(0.27)     |                 | -0.09<br>(0.28) |
| <i>Region of practice (omitted: Northeast)</i>                              |                 |                   |                 |                    |                 |                 |
| Midwest                                                                     |                 | 0.05<br>(0.21)    |                 | -0.08<br>(0.21)    |                 | -0.36<br>(0.23) |
| South                                                                       |                 | 0.02<br>(0.19)    |                 | -0.02<br>(0.23)    |                 | -0.02<br>(0.24) |
| West                                                                        |                 | -0.07<br>(0.20)   |                 | -0.48***<br>(0.17) |                 | -0.22<br>(0.22) |
| <i>Method of recruitment (omitted: Author's contact)</i>                    |                 |                   |                 |                    |                 |                 |
| Referred by author's contact                                                |                 | -0.22<br>(0.15)   |                 | -0.07<br>(0.15)    |                 | -0.07<br>(0.18) |
| Web search                                                                  |                 | -0.32<br>(0.34)   |                 | 0.41<br>(0.31)     |                 | 0.24<br>(0.40)  |
| Constant                                                                    | -0.03<br>(0.13) | 0.39*<br>(0.20)   | 0.14<br>(0.13)  | 0.19<br>(0.23)     | 0.19<br>(0.15)  | 0.42<br>(0.29)  |
| N                                                                           | 284             | 284               | 284             | 284                | 231             | 231             |
| R squared                                                                   | 0.02            | 0.07              | 0.01            | 0.05               | 0.01            | 0.04            |

Notes: Rank regressions transforming the parameters CCEI (columns 1-2),  $\alpha$  (columns 3-4), and  $\rho$  (columns 5-6) from the physician sample into an overall ranking, which is then normalized to have mean zero and standard deviation (SD) one. The  $\rho$  parameter of purely selfless ( $\alpha = 0$ ) and purely selfish ( $\alpha = 1$ ) subjects, who always give nothing or everything to other, cannot be identified. In the regressions reported in columns 5-6, we thus omit purely selfless and purely selfish using a one-side test at the 10% level. Standard errors are in parenthesis, bootstrapped using 500 repetitions. \*, \*\*, \*\*\*, and \*\*\*\* stand for 0.10, 0.05, 0.01, and 0.001 significance level, respectively.

Table A3: The effect of age and income on rationally (CCEI), altruism ( $\alpha$ ) and equality-efficiency orientation ( $\rho$ ) in the ALP samples.

|              | (1)                 | (2)              | (3)                 | (4)                 | (5)               | (6)                 | (7)                 | (8)               | (9)                 |
|--------------|---------------------|------------------|---------------------|---------------------|-------------------|---------------------|---------------------|-------------------|---------------------|
|              | CCEI                | $\alpha$         | $\rho$              | CCEI                | $\alpha$          | $\rho$              | CCEI                | $\alpha$          | $\rho$              |
| Female       | -0.26****<br>(0.07) | -0.14<br>(0.09)  | -0.14<br>(0.12)     | -0.24****<br>(0.07) | -0.11<br>(0.09)   | -0.12<br>(0.11)     | -0.24****<br>(0.07) | -0.10<br>(0.09)   | -0.15<br>(0.11)     |
| Elite        | 0.42***<br>(0.14)   | 0.20<br>(0.17)   | 0.11<br>(0.22)      |                     |                   |                     |                     |                   |                     |
| Age          |                     |                  |                     |                     |                   |                     |                     |                   |                     |
| 31-39        | -0.02<br>(0.12)     | 0.02<br>(0.17)   | -0.59***<br>(0.20)  |                     |                   |                     | -0.02<br>(0.12)     | 0.01<br>(0.17)    | -0.59***<br>(0.19)  |
| 40-49        | 0.07<br>(0.12)      | -0.04<br>(0.17)  | -0.63***<br>(0.20)  |                     |                   |                     | 0.05<br>(0.12)      | -0.04<br>(0.17)   | -0.56***<br>(0.19)  |
| 50-59        | 0.13<br>(0.11)      | 0.05<br>(0.15)   | -0.59***<br>(0.19)  |                     |                   |                     | 0.10<br>(0.11)      | 0.02<br>(0.15)    | -0.51***<br>(0.18)  |
| $\geq 60$    | 0.03<br>(0.11)      | 0.31**<br>(0.15) | -0.89****<br>(0.19) |                     |                   |                     | -0.00<br>(0.11)     | 0.27*<br>(0.15)   | -0.88****<br>(0.18) |
| Income       |                     |                  |                     |                     |                   |                     |                     |                   |                     |
| 2nd Quintile |                     |                  |                     | 0.14<br>(0.10)      | 0.22<br>(0.15)    | -0.27<br>(0.17)     | 0.15<br>(0.10)      | 0.20<br>(0.15)    | -0.26<br>(0.16)     |
| 3rd Quintile |                     |                  |                     | 0.13<br>(0.10)      | 0.40***<br>(0.13) | -0.35**<br>(0.16)   | 0.14<br>(0.10)      | 0.36***<br>(0.13) | -0.27*<br>(0.15)    |
| 4th Quintile |                     |                  |                     | 0.26**<br>(0.11)    | 0.45***<br>(0.14) | -0.57****<br>(0.17) | 0.25**<br>(0.11)    | 0.44***<br>(0.14) | -0.55****<br>(0.16) |
| 5th Quintile |                     |                  |                     | 0.38****<br>(0.11)  | 0.42***<br>(0.15) | -0.13<br>(0.18)     | 0.38****<br>(0.11)  | 0.43***<br>(0.15) | -0.12<br>(0.17)     |
| Constant     | 0.13<br>(0.10)      | -0.02<br>(0.15)  | 0.69****<br>(0.18)  | 0.03<br>(0.09)      | -0.22*<br>(0.12)  | 0.36***<br>(0.14)   | -0.00<br>(0.12)     | -0.28<br>(0.18)   | 0.90****<br>(0.19)  |
| N            | 1,038               | 1,038            | 880                 | 1,034               | 1,034             | 876                 | 1,034               | 1,034             | 876                 |

Notes: The association between age (columns 1-3, 7-9) and income (columns 4-6, 7-9) and our measures of rationality and social preferences – CCEI (columns 1, 4 and 7),  $\alpha$  (columns 2, 5 and 8), and  $\rho$  (columns 3, 6 and 9). The  $\rho$  parameter of purely selfless ( $\alpha = 0$ ) and purely selfish ( $\alpha = 1$ ) subjects, who always give nothing or everything to other, cannot be identified. In the regressions reported in columns 3, 6 and 9, we thus omit purely selfless and purely selfish using a one-side test at the 10% level. Robust standard errors are in parenthesis. \*, \*\*, \*\*\*, and \*\*\*\* stand for 0.10, 0.05, 0.01, and 0.001 significance level, respectively.
